# Supplementary material
Source: HighWire-hosted journal article supplement (http://molpharm.aspetjournals.org/highwire/filestream/77159/field_highwire_adjunct_files/0/supplementary_data_for_MOL_81075.pdf)
Supplement: supplementary_data_for_MOL_81075.pdf [file supplementary_data_for_MOL_81075.pdf]

## Supplementary data for Molecular Pharmacology

## Mechanism of the anti-proliferative activity of some naphthalene diimide G-quadruplex ligands

Sonja M. Hampel, Antonella Pepe, Karin M. Greulich-Bode, Sanjay V. Malhotra, Anthony P Reszka, Sebastian Veith, Petra Boukamp, Stephen Neidle

| name                 | nucleotide type | sequence                                            | cation          | T <sub>m</sub> [°C] |
|----------------------|-----------------|-----------------------------------------------------|-----------------|---------------------|
| <b>F21T</b>          | G4-DNA          | 5'-FAM-GGG TTA GGG TTA GGG TTA GGG-TAMRA-3'         | K <sup>+</sup>  | 58                  |
| <b><i>c-kit1</i></b> | G4-DNA          | 5'-FAM-AGA GGG AGG GCG CTG GGA GGA GGG GCT-TAMRA-3' | K <sup>+</sup>  | 52                  |
| <b><i>c-kit2</i></b> | G4-DNA          | 5'-FAM-CCC GGG CGG GCG CGA GGG AGG GGA GG-TAMRA-3'  | K <sup>+</sup>  | 55                  |
| <b><i>bcl-2</i></b>  | G4-RNA          | 5'-FAM-GGG GGC CGU GGG GUG GGA GCU GGG G-TAMRA-3'   | Na <sup>+</sup> | 68                  |
| <b><i>hif-1α</i></b> | G4-DNA          | 5'-FAM-GGG GAG GGG AGA GGG GGC GGG-TAMRA            | K <sup>+</sup>  | 78                  |
| <b>T-loop</b>        | duplex-DNA      | 5'-FAM-TAT AGC TATA TTT TTT TATA GCT ATA-TAMRA-3'   | K <sup>+</sup>  | 54                  |

**Table S1:** Nucleotide sequences used for FRET experiments.

| <i>Correlation</i> | <i>Seed</i>                    | <i>target</i>                            | <i>mechanism of action</i>                                                                                        | <i>Common cell lines</i> | <i>Seed stand. Dev.</i> | <i>Target stand. Dev.</i> |
|--------------------|--------------------------------|------------------------------------------|-------------------------------------------------------------------------------------------------------------------|--------------------------|-------------------------|---------------------------|
| <b>0.82</b>        | <b>BMSG-SH-3</b><br>NSC 753939 | NSC S342443<br>phyllanthoside            | Inhibition of protein synthesis (Chan et al., 2004).                                                              | 47                       | 0.48                    | 0.628                     |
| <b>0.79</b>        | <b>BMSG-SH-3</b><br>NSC 753939 | NSC S707020<br>oxa-spermine<br>homologue | affects polyamine metabolism; derivatives interact with DNA (Kuska et al., 2002).                                 | 58                       | 0.503                   | 0.293                     |
| <b>0.759</b>       | <b>BMSG-SH-3</b><br>NSC 753939 | NSC S764111<br>olivomycin                | Binds to GC-rich stretches in DNA minor groove and alters transcription and replication (Cheglakov et al., 2010). | 47                       | 0.511                   | 0.783                     |
| <b>0.753</b>       | <b>BMSG-SH-3</b><br>NSC 753939 | NSC S353076<br>ellipticinium derivative  | DNA intercalating agent (Larne et al., 1987). Derivatives stabilise G-quadruplex DNA (Brooks et al., 2011).       | 47                       | 0.48                    | 0.517                     |
| <b>0.751</b>       | <b>BMSG-SH-3</b><br>NSC 753939 | NSC S259969<br>deoxybouvardin            | Inhibits protein synthesis, decreases expression of cell cycle protein cyclin D (Wakita et al., 2001).            | 47                       | 0.48                    | 0.457                     |
| <b>0.745</b>       | <b>BMSG-SH-3</b><br>NSC 753939 | NSC S682066<br>A phosphonium-porphyrin   | Photochemical DNA cleavage (Saito et al., 1994). Analogs are G-quadruplex ligands (Izbicka et al., 1999).         | 59                       | 0.499                   | 0.53                      |
| <b>0.74</b>        | <b>BMSG-SH-3</b><br>NSC 753939 | NSC S259968<br>bouvardin                 | Inhibits protein synthesis (Zalacain et al., 1982).                                                               | 47                       | 0.48                    | 0.683                     |
| <b>0.733</b>       | <b>BMSG-SH-3</b><br>NSC 753939 | NSC S667645                              | n. a.                                                                                                             | 59                       | 0.499                   | 0.57                      |

|              |                  |                     |                                                   |    |       |       |
|--------------|------------------|---------------------|---------------------------------------------------|----|-------|-------|
|              |                  |                     | substituted acridine                              |    |       |       |
| <b>0.729</b> | <b>BMSG-SH-3</b> | NSC S715654         | DNA binding agent (Spsychala et al.,              | 56 | 0.51  | 0.371 |
|              | NSC 753939       |                     | 2008; Spsychala et al., 2009).                    |    |       |       |
| <b>0.719</b> | <b>BMSG-SH-3</b> | NSC S58514          | binds to GC rich DNA, inhibits RNA                | 47 | 0.48  | 0.413 |
|              | NSC 753939       |                     | synthesis ( <a href="#">NCI drug dictionary</a> ) |    |       |       |
|              |                  | chromomycin         |                                                   |    |       |       |
| <b>0.704</b> | <b>BMSG-SH-3</b> | NSC 80467           | n. a.                                             | 46 | 0.473 | 0.716 |
|              | NSC 753939       |                     |                                                   |    |       |       |
| <b>0.701</b> | <b>BMSG-SH-3</b> | NSC S337766         | DNA intercalation, DNA single-strand              | 47 | 0.48  | 0.622 |
|              | NSC 753939       |                     | breaks, DNA-protein crosslinking,                 |    |       |       |
|              |                  | bisantrene          | inhibition of DNA replication (Elliott et         |    |       |       |
|              |                  | hydrochloride       | al., 1989; NCI online drug                        |    |       |       |
|              |                  |                     | dictionary).                                      |    |       |       |
| <b>0.7</b>   | <b>BMSG-SH-3</b> | NSC S35441          | DNA intercalator (Wakelin & Waring,               | 59 | 0.501 | 0.513 |
|              | NSC 753939       |                     | 1974).                                            |    |       |       |
|              |                  | a phenanthridinium  |                                                   |    |       |       |
|              |                  | derivative          |                                                   |    |       |       |
| <b>0.7</b>   | <b>BMSG-SH-3</b> | NSC S666489         | Inhibitor of histone methyltransferase            | 59 | 0.499 | 0.522 |
|              | NSC 753939       |                     | Pr-Set7 (Kodama et al., 2011).                    |    |       |       |
|              |                  | Phosphonium aryl    | Analogs localise in mitochondria and              |    |       |       |
|              |                  | compound            | decrease oxygen consumption                       |    |       |       |
|              |                  |                     | (Millard et al., 2010).                           |    |       |       |
| <b>0.697</b> | <b>BMSG-SH-3</b> | NSC S38270          | Binds to GC-rich stretches in DNA                 | 59 | 0.499 | 0.45  |
|              | NSC 753939       |                     | minor groove and alters transcription             |    |       |       |
|              |                  | olivomycin          | and replication (Cheglakov et al.,                |    |       |       |
|              |                  |                     | 2010).                                            |    |       |       |
| <b>0.693</b> | <b>BMSG-SH-3</b> | NSC S49842          | Mitotic block (Jordan et al., 1992).              | 47 | 0.535 | 0.766 |
|              | NSC 753939       |                     |                                                   |    |       |       |
|              |                  | vinblastine sulfate |                                                   |    |       |       |
| <b>0.693</b> | <b>BMSG-SH-3</b> | NSC S682345         | antiinflammatory C5a antagonist                   | 59 | 0.499 | 0.265 |

|              |                                |                                                 |                                                                                                                                                                             |    |       |       |
|--------------|--------------------------------|-------------------------------------------------|-----------------------------------------------------------------------------------------------------------------------------------------------------------------------------|----|-------|-------|
|              | NSC 753939                     | Aurantimycin                                    | (Assem et al., 2008).                                                                                                                                                       |    |       |       |
| <b>0.692</b> | <b>BMSG-SH-3</b><br>NSC 753939 | NSC S219241<br>a phosphonium aryl<br>compound   | Analogs localise in mitochondria and<br>decrease oxygen consumption<br>(Millard et al., 2010).                                                                              | 58 | 0.503 | 0.484 |
| <b>0.691</b> | <b>BMSG-SH-3</b><br>NSC 753939 | NSC S352671<br>a phenanthridine                 | analogs are DNA intercalators<br>(Wakelin & Waring, 1974; De<br>Stefano et al., 2009), and G-<br>quadruplex ligands (Bai, 2008; Maiti<br>& Kumar, 2010; Yang et al., 2010). | 56 | 0.51  | 0.572 |
| <b>0.688</b> | <b>BMSG-SH-3</b><br>NSC 753939 | NSC S673349<br>anthraquinone<br>derivative      | analogs are DNA intercalators<br>(NSC724629)                                                                                                                                | 57 | 0.494 | 0.351 |
| <b>0.684</b> | <b>BMSG-SH-3</b><br>NSC 753939 | NSC S324646<br>malformin a                      | Inhibitor of protein synthesis (Dawes,<br>1994).                                                                                                                            | 53 | 0.506 | 0.454 |
| <b>0.676</b> | <b>BMSG-SH-3</b><br>NSC 753939 | NSC S713157<br>13,14,15-<br>isocrambescidin 800 | blocks Ca <sup>2+</sup> channel (Berlinck et al.,<br>1993).                                                                                                                 | 54 | 0.514 | 0.205 |
| <b>0.672</b> | <b>BMSG-SH-3</b><br>NSC 753939 | NSC S246012<br>Benzophenanthridiniu<br>m        | analogs are DNA intercalators<br>(Wakelin & Waring, 1974; De<br>Stefano et al., 2009), and G-<br>quadruplex ligands (Bai, 2008; Maiti<br>& Kumar, 2010; Yang et al., 2010). | 55 | 0.513 | 0.593 |
| <b>0.669</b> | <b>BMSG-SH-3</b><br>NSC 753939 | NSC S674091                                     | Topoisomerase-targeted anticancer<br>drug, DNA binder (Spicer et al.,<br>2002).                                                                                             | 59 | 0.499 | 0.339 |
| <b>0.661</b> | <b>BMSG-SH-3</b><br>NSC 753939 | NSC S339570                                     | Analogs localise in mitochondria and<br>decrease oxygen consumption                                                                                                         | 51 | 0.518 | 0.334 |

|              |                                |                                              |                                                                                                                                         |    |       |       |
|--------------|--------------------------------|----------------------------------------------|-----------------------------------------------------------------------------------------------------------------------------------------|----|-------|-------|
|              |                                | A phosphonium aryl derivative                | (Millard et al., 2010).                                                                                                                 |    |       |       |
| <b>0.66</b>  | <b>BMSG-SH-3</b><br>NSC 753939 | NSC S289922<br>A phosphonium aryl derivative | Analogs localise in mitochondria and decrease oxygen consumption (Millard et al., 2010).                                                | 59 | 0.499 | 0.668 |
| <b>0.659</b> | <b>BMSG-SH-3</b><br>NSC 753939 | NSC S685703<br>didemnin analog               | Analog inhibits protein synthesis (Ahuja et al., 2000).                                                                                 | 59 | 0.499 | 0.314 |
| <b>0.654</b> | <b>BMSG-SH-3</b><br>NSC 753939 | NSC S634791                                  | DNA binder (Dimmock et al., 1992).                                                                                                      | 60 | 0.497 | 0.49  |
| <b>0.654</b> | <b>BMSG-SH-3</b><br>NSC 753939 | NSC S724629                                  | a topoisomerase I inhibitor and DNA intercalator (Dezhenkova et al., 2008).                                                             | 57 | 0.506 | 0.472 |
| <b>0.654</b> | <b>BMSG-SH-3</b><br>NSC 753939 | NSC S644614<br>a triarylethene               | n. a.                                                                                                                                   | 50 | 0.501 | 0.393 |
| <b>0.652</b> | <b>BMSG-SH-3</b><br>NSC 753939 | NSC S632624<br>ellipticinium derivative      | Derivatives stabilise G-quadruplex DNA (Brooks et al., 2011).                                                                           | 47 | 0.479 | 0.389 |
| <b>0.651</b> | <b>BMSG-SH-3</b><br>NSC 753939 | NSC S368672<br>quassinoid                    | inhibits translation of hif-1 $\alpha$ and c-myc through eIF4E phosphorylation pathway (Jin et al., 2008; Mata-Greenwood et al., 2002). | 47 | 0.48  | 0.275 |
| <b>0.648</b> | <b>BMSG-SH-3</b><br>NSC 753939 | NSC S176878<br>A phosphonium aryl derivative | Analogs localise in mitochondria and decrease oxygen consumption (Millard et al., 2010).                                                | 47 | 0.48  | 0.419 |
| <b>0.648</b> | <b>BMSG-SH-3</b><br>NSC 753939 | NSC S179220<br>azothiazolium                 | n. a.                                                                                                                                   | 59 | 0.496 | 0.544 |

|              |                                |                                                                       |                                                                                                                             |    |       |       |
|--------------|--------------------------------|-----------------------------------------------------------------------|-----------------------------------------------------------------------------------------------------------------------------|----|-------|-------|
|              |                                | derivative                                                            |                                                                                                                             |    |       |       |
| <b>0.647</b> | <b>BMSG-SH-3</b><br>NSC 753939 | NSC S747162<br>mitotempol                                             | mitochondria-targeted antioxidant,<br>decreases reactive oxygen species<br>and muscle differentiation (Lee et al.,<br>2011) | 60 | 0.497 | 0.346 |
| <b>0.646</b> | <b>BMSG-SH-3</b><br>NSC 753939 | NSC S714616                                                           | nucleic acid binding (Kang et al.,<br>2004; Spsychala, 2008; Spsychala,<br>2009).                                           | 57 | 0.507 | 0.207 |
| <b>0.641</b> | <b>BMSG-SH-3</b><br>NSC 753939 | NSC S710608                                                           | DNA binding (Spsychala, 2008;<br>Spsychala, 2009).                                                                          | 59 | 0.499 | 0.303 |
| <b>0.638</b> | <b>BMSG-SH-3</b><br>NSC 753939 | NSC S665806<br>didemnin analog                                        | Analog inhibits protein synthesis<br>(Ahuja et al., 2000).                                                                  | 58 | 0.5   | 0.538 |
| <b>0.638</b> | <b>BMSG-SH-3</b><br>NSC 753939 | NSC S226510                                                           | n. a.                                                                                                                       | 47 | 0.483 | 0.192 |
| <b>0.637</b> | <b>BMSG-SH-3</b><br>NSC 753939 | NSC S694330<br>didemnin analog                                        | Analog inhibits protein synthesis<br>(Ahuja et al., 2000).                                                                  | 58 | 0.502 | 0.177 |
| <b>0.637</b> | <b>BMSG-SH-3</b><br>NSC 753939 | NSC S711659<br>azaharman analog;<br><br>aza-ellipticine<br>derivative | Derivatives stabilise G-quadruplex<br>DNA (Brooks et al., 2011).                                                            | 57 | 0.505 | 0.326 |
| 0.91         | <b>BMSG-SH-4</b><br>NSC 753938 | NSC:S753940<br>Naphthalene diimide<br>BMSG-SH-5                       | Analog of the seed, G-quadruplex<br>ligand (Cuenca et al., 2008).                                                           | 60 | 0.389 | 0.285 |
| 0.584        | <b>BMSG-SH-4</b><br>NSC 753938 | NSC:S625331<br>aza-ellipticine                                        | DNA affinity (Nguyen et al., 1987).<br>Derivatives stabilise G-quadruplex<br>DNA (Brooks et al., 2011).                     | 46 | 0.382 | 0.336 |

|       |                                | derivative  |                                                                                           |    |       |       |
|-------|--------------------------------|-------------|-------------------------------------------------------------------------------------------|----|-------|-------|
| 0.577 | <b>BMSG-SH-4</b><br>NSC 753938 | NSC:S721046 | n. a.                                                                                     | 50 | 0.401 | 0.247 |
| 0.541 | <b>BMSG-SH-4</b><br>NSC 753938 | NSC:S656125 | n. a.                                                                                     | 49 | 0.375 | 0.213 |
| 0.531 | <b>BMSG-SH-4</b><br>NSC 753938 | NSC:S155694 | Derivatives stabilise G-quadruplex DNA (Brooks et al., 2011).<br>ellipticinium derivative | 47 | 0.386 | 0.571 |
| 0.525 | <b>BMSG-SH-4</b><br>NSC 753938 | NSC:S656575 | n. a.<br>Maleopimaric acid<br>amide                                                       | 47 | 0.379 | 0.197 |
| 0.519 | <b>BMSG-SH-4</b><br>NSC 753938 | NSC:S268239 | Adriamycin derivative<br>(an anthracycline)                                               | 49 | 0.368 | 0.298 |
| 0.516 | <b>BMSG-SH-4</b><br>NSC 753938 | NSC:S298223 | CC-1065                                                                                   | 46 | 0.39  | 0.64  |
| 0.506 | <b>BMSG-SH-4</b><br>NSC 753938 | NSC:S671450 | n. a.                                                                                     | 54 | 0.36  | 0.168 |
| 0.505 | <b>BMSG-SH-4</b><br>NSC 753938 | NSC:S32938  | antimalarial,<br>a cresol derivative                                                      | 56 | 0.376 | 0.138 |
| 0.91  | <b>BMSG-SH-5</b><br>NSC 753940 | NSC:S753938 | Naphthalene diimide<br>BMSG-SH-4                                                          | 60 | 0.285 | 0.389 |

## MOL #81075

|       |                                |                                                          |                                                                                                                                                                                                                                                            |    |       |       |
|-------|--------------------------------|----------------------------------------------------------|------------------------------------------------------------------------------------------------------------------------------------------------------------------------------------------------------------------------------------------------------------|----|-------|-------|
| 0.593 | <b>BMSG-SH-5</b><br>NSC 753940 | NSC:S625331<br>aza-ellipticine<br>derivative             | DNA affinity (Nguyen et al., 1987).<br>Derivatives stabilise G-quadruplex<br>DNA (Brooks et al., 2011).                                                                                                                                                    | 46 | 0.263 | 0.336 |
| 0.584 | <b>BMSG-SH-5</b><br>NSC 753940 | NSC:S58514<br>Chromomycin A3                             | binds to GC rich DNA, inhibits RNA<br>synthesis<br>( <a href="http://www.cancer.gov/drugdictionary?cdrid=39184">http://www.cancer.gov/drugdictionary?cdrid=39184</a> )                                                                                     | 47 | 0.275 | 0.413 |
| 0.577 | <b>BMSG-SH-5</b><br>NSC 753940 | NSC:S753939<br>Naphthalene diimide<br>BMSG-SH-3          | Analog of the seed, G-quadruplex<br>ligand (Hampel et al., 2010).                                                                                                                                                                                          | 60 | 0.285 | 0.497 |
| 0.572 | <b>BMSG-SH-5</b><br>NSC 753940 | NSC:S155694<br>ellipticinium derivative                  | Derivatives stabilise G-quadruplex<br>DNA (Brooks et al., 2011).                                                                                                                                                                                           | 47 | 0.275 | 0.571 |
| 0.567 | <b>BMSG-SH-5</b><br>NSC 753940 | NSC:S325319<br>didemnin B                                | inhibits protein synthesis via binding<br>to complexes between ribosomes<br>and the elongation factor EF-1 $\alpha$ ,<br>which prevents binding to elongation<br>factor EF-2 (Ahuja et al., 2000).                                                         | 55 | 0.287 | 0.346 |
| 0.547 | <b>BMSG-SH-5</b><br>NSC 753940 | NSC:S705956<br>didesmethylrocaglamide                    | Inhibitor of translation initiation,<br>causes G2/M block (Cencic et al.,<br>2009).                                                                                                                                                                        | 57 | 0.284 | 0.121 |
| 0.537 | <b>BMSG-SH-5</b><br>NSC 753940 | NSC:S254681<br>12-iminodaunorubicin<br>(an anthracyclin) | Analogs are G-quadruplex ligands<br>(Manet et al., 2010; Clark et al.,<br>2003). Inhibition of transcription by<br>interacting with DNA in gene<br>promoter regions (Banerjee &<br>Mukhopadhyay, 2008; Sriram et al.,<br>1991; Mansilla & Portugal, 2008). | 50 | 0.284 | 0.818 |



|       |                                |                                                |                                                                                                                                                                                                                                            |    |       |       |
|-------|--------------------------------|------------------------------------------------|--------------------------------------------------------------------------------------------------------------------------------------------------------------------------------------------------------------------------------------------|----|-------|-------|
| 0.535 | <b>BMSG-SH-5</b><br>NSC 753940 | NSC:S265450<br>nogalomycin c (an anthracyclin) | Analogues are G-quadruplex ligands (Manet et al., 2010; Clark et al., 2003). Inhibition of transcription by interacting with DNA in gene promoter regions (Banerjee & Mukhopadhyay, 2008; Sriram et al., 1991; Mansilla & Portugal, 2008). | 47 | 0.275 | 0.43  |
| 0.53  | <b>BMSG-SH-5</b><br>NSC 753940 | NSC:S259968<br>bouvardin                       | Inhibits protein synthesis (Zalacain et al., 1982).                                                                                                                                                                                        | 51 | 0.281 | 0.563 |
| 0.526 | <b>BMSG-SH-5</b><br>NSC 753940 | NSC:S259969<br>deoxybouvardin                  | Inhibits protein synthesis, decreases expression of cell cycle protein cyclin D (Wakita et al., 2001).                                                                                                                                     | 47 | 0.275 | 0.457 |
| 0.523 | <b>BMSG-SH-5</b><br>NSC 753940 | NSC:S342443<br>Phyllantoside, S3'-desacetyl-   | Analogues inhibit protein synthesis (Chan et al., 2004).                                                                                                                                                                                   | 47 | 0.275 | 0.628 |
| 0.521 | <b>BMSG-SH-5</b><br>NSC 753940 | NSC:S368672<br>quassinoid                      | inhibits translation of <i>hif-1<math>\alpha</math></i> and <i>c-myc</i> through eIF4E phosphorylation pathway (Jin et al., 2008; Mata-Greenwood et al., 2002).                                                                            | 47 | 0.275 | 0.275 |
| 0.52  | <b>BMSG-SH-5</b><br>NSC 753940 | NSC:S351710<br>2-methylelliciniumiodide        | Derivatives stabilise G-quadruplex DNA (Brooks et al., 2011).                                                                                                                                                                              | 47 | 0.275 | 0.62  |
| 0.517 | <b>BMSG-SH-5</b><br>NSC 753940 | NSC:S131547<br>tubulosine                      | disrupts mitosis (Farjaudon et al., 1988).                                                                                                                                                                                                 | 59 | 0.286 | 0.458 |
| 0.516 | <b>BMSG-SH-5</b><br>NSC 753940 | NSC:S672658                                    | n. a.                                                                                                                                                                                                                                      | 54 | 0.283 | 0.236 |

|       |                                |                                                |                                                                                                |    |       |       |
|-------|--------------------------------|------------------------------------------------|------------------------------------------------------------------------------------------------|----|-------|-------|
|       |                                | a peptide                                      |                                                                                                |    |       |       |
| 0.51  | <b>BMSG-SH-5</b><br>NSC 753940 | NSC:S83193<br>C.I. basic blue 1                | n. a.                                                                                          | 60 | 0.285 | 0.193 |
| 0.508 | <b>BMSG-SH-5</b><br>NSC 753940 | NSC:S671035                                    | n. a.                                                                                          | 58 | 0.274 | 0.141 |
| 0.502 | <b>BMSG-SH-5</b><br>NSC 753940 | NSC:S670163<br>an aryl phosphonium<br>compound | Analogs localise in mitochondria and<br>decrease oxygen consumption<br>(Millard et al., 2010). | 55 | 0.28  | 0.478 |

**Table S2:** COMPARE study of compounds BMSG-SH-3 – 5 against NCI compound library. References for the mechanisms of action of correlated compounds are listed in the supplementary material section.

| <i>Correlatio<br/>n</i> | <i>Seed</i>                    | <i>target vector</i>                  | <i>function of vector</i>                                                                                                                                                    | <i>Common<br/>cell lines</i> | <i>Seed<br/>stand.<br/>Dev.</i> | <i>Target<br/>stand.<br/>Dev.</i> |
|-------------------------|--------------------------------|---------------------------------------|------------------------------------------------------------------------------------------------------------------------------------------------------------------------------|------------------------------|---------------------------------|-----------------------------------|
| <b>0.627</b>            | <b>BMSG-SH-3</b><br>NSC 753939 | Moltd: GC15718,<br>Genecard: HNRPLL   | Encodes for RNA-binding protein<br>which regulates alternative splicing<br>for multiple target mRNAs<br>(Yamamoto et al., 2009).                                             | 59                           | 0.499                           | 0.221                             |
| <b>0.581</b>            | <b>BMSG-SH-3</b><br>NSC 753939 | Moltd: GC17547,<br>Genecard: ACYP1    | Encodes for Acylphosphatase-1<br>enzyme, which may be involved in<br>alternative splicing and cell cycle<br>regulation (Degl'innocenti et al.,<br>2004; Stone et al., 2010). | 59                           | 0.499                           | 0.189                             |
| <b>0.564</b>            | <b>BMSG-SH-3</b><br>NSC 753939 | Moltd: GC60277,<br>Genecard: C9orf173 | chromosome 9 open reading frame,<br>encoding for hypothetical protein<br>LOC441476, function unknown (Ota<br>et al., 2004).                                                  | 59                           | 0.499                           | 88.127                            |
| <b>0.491</b>            | <b>BMSG-SH-3</b><br>NSC 753939 | Moltd: GC67014,                       | Encodes for RNA-binding protein<br>which regulates alternative splicing                                                                                                      | 59                           | 0.499                           | 165.655                           |

|       |                                |                                       |                                                                                                                                                                                                                                |    |       |         |
|-------|--------------------------------|---------------------------------------|--------------------------------------------------------------------------------------------------------------------------------------------------------------------------------------------------------------------------------|----|-------|---------|
|       |                                | Genecard: HNRPLL                      | for multiple target mRNAs<br>(Yamamoto et al., 2009).                                                                                                                                                                          |    |       |         |
| 0.478 | <b>BMSG-SH-3</b><br>NSC 753939 | MoltId: GC91516,<br>Genecard: SNX31   | Sorting nexin 31, involved in protein transport and sorting, membrane trafficking, and alternative splicing (Ghaj et al., 2011).                                                                                               | 59 | 0.499 | 22.043  |
| 0.471 | <b>BMSG-SH-3</b><br>NSC 753939 | MoltId: GC66400,<br>Genecard: FAM124A | unknown (Ota et al., 2004).                                                                                                                                                                                                    | 59 | 0.499 | 108.146 |
| 0.522 | <b>BMSG-SH-4</b><br>NSC 753938 | MoltId: GC160652,<br>Genecard: OSCP1  | Organic solute carrier partner 1, a transporter which may be involved in drug clearance in placenta (Kobayashi et al., 2005).                                                                                                  | 59 | 0.391 | 29,463  |
| 0.494 | <b>BMSG-SH-4</b><br>NSC 753938 | MoltId: GC182826,<br>Genecard: SQSTM1 | Sequestosome 1. Involved in polyubiquitination, trafficking, inclusions, and adapter protein binding to ubiquitin. May regulate signaling cascades (e. g. apoptosis, K <sup>+</sup> channel regulation) (Young & Keiko, 2009). | 59 | 0.391 | 368.75  |
| 0.494 | <b>BMSG-SH-4</b><br>NSC 753938 | MoltId: GC84738,<br>Genecard: TP53/13 | Tumour protein 53 inducible protein 13, may act as tumour suppressor<br><b>(reference)</b>                                                                                                                                     | 59 | 0.391 | 199.379 |
| 0.486 | <b>BMSG-SH-4</b><br>NSC 753938 | MoltId: GC188357,<br>Genecard: THAP10 | Encodes for proteins containing domains similar to DNA binding zinc finger domains; regulates cytokine expression (Champagne et al., 2010 ; Clouaire et al., 2005).                                                            | 59 | 0.391 | 26.648  |
| 0.484 | <b>BMSG-SH-4</b><br>NSC 753938 | MoltId: GC169527,<br>Genecard: SQSTM1 | Sequestosome 1. Involved in polyubiquitination, trafficking,                                                                                                                                                                   | 59 | 0.391 | 68.33   |

|       |                                |                                     |                                                                                                                                                                                                                                |    |       |         |
|-------|--------------------------------|-------------------------------------|--------------------------------------------------------------------------------------------------------------------------------------------------------------------------------------------------------------------------------|----|-------|---------|
|       |                                |                                     | inclusions, and adapter protein binding to ubiquitin. May regulate signaling cascades (e. g. apoptosis, K <sup>+</sup> channel regulation) (Young & Keiko, 2009).                                                              |    |       |         |
| 0.483 | <b>BMSG-SH-4</b><br>NSC 753938 | MolId: GC96959,<br>Genecard: SQSTM1 | Sequestosome 1. Involved in polyubiquitination, trafficking, inclusions, and adapter protein binding to ubiquitin. May regulate signaling cascades (e. g. apoptosis, K <sup>+</sup> channel regulation) (Young & Keiko, 2009). | 59 | 0.391 | 476.204 |
| 0.48  | <b>BMSG-SH-5</b><br>NSC 753940 | MolId: GC152314,<br>Genecard: ASB1  | Encodes for ankyrin repeat and SOCs box protein 1 (suppressor of cytokine signaling) (Kohroki et al., 2005).                                                                                                                   | 59 | 0.286 | 31.644  |
| 0.471 | <b>BMSG-SH-5</b><br>NSC 753940 | MolId: GC93247,<br>Genecard: IDS    | Encodes for Iduronate-2 sulfatase, which is required for lysosomal degradation of heparan and dermatan sulfate, and is related to the Hunter syndrome (Froissart et al., 1995).                                                | 59 | 0.286 | 92.605  |
| 0.469 | <b>BMSG-SH-5</b><br>NSC 753940 | MolId: GC187706,<br>Genecard: ZHHC4 | Encodes for zinc finger protein 374, a palmitoyltransferase (Ota et al., 2004).                                                                                                                                                | 59 | 0.286 | 89.778  |
| 0.467 | <b>BMSG-SH-5</b><br>NSC 753940 | MolId: GC36321,<br>Genecard: NFIC   | Encodes for protein binding to palindromic sequences in promoters and activates transcription and replication (Santoro et al., 1988).                                                                                          | 59 | 0.286 | 53.55   |

MOL #81075

|       |                   |                    |                                                                                         |    |       |        |
|-------|-------------------|--------------------|-----------------------------------------------------------------------------------------|----|-------|--------|
| 0.464 | <b>BMSG-SH-5</b>  | MolId: GC47494,    | Encodes for a subunit of V-ATPase,                                                      | 59 | 0.286 | 41.437 |
|       | <b>NSC 753940</b> | Genecard: ATP6V1B1 | which acidifies intercellular<br>compartments (Paunescu et al.,<br>2007).               |    |       |        |
| 0.457 | <b>BMSG-SH-5</b>  | MolId: GC60277,    | chromosome 9 open reading frame,                                                        | 59 | 0.286 | 88.127 |
|       | <b>NSC 753940</b> | Genecard: C9orf173 | encoding for hypothetical protein<br>LOC441476, function unknown (Ota<br>et al., 2004). |    |       |        |

**Table S3:** COMPARE study of compounds BMSG-SH-3 – 5 against **Brown/Botstein/Weinstein** microarray dataset. References for the functions of vectors are listed in the supplementary material section.

#### Uptake study on MCF7 cells

Dimensions: x: 146.11  $\mu\text{m}$ , Y: 146.11  $\mu\text{m}$

Objective: Plan-Apochromat 63x/1.4 Oil DIC M27

Pixel dwell: 1.60  $\mu\text{s}$

Average: line 4

Master gain: Ch1 : 775; ChD : 319

Digital gain: 1.00

Digital offset: Ch1 : -0.10; ChD : 0.08

Pinhole: 106  $\mu\text{m}$

Filter: LP 560

Beam Splitters: MBS : HFT 488/543; DBS1: Mirror; DBS2: Plate.

Laser: 543 nm : 100 %.

Manual corrections: Brightness 45 %; Contrast 55 %.

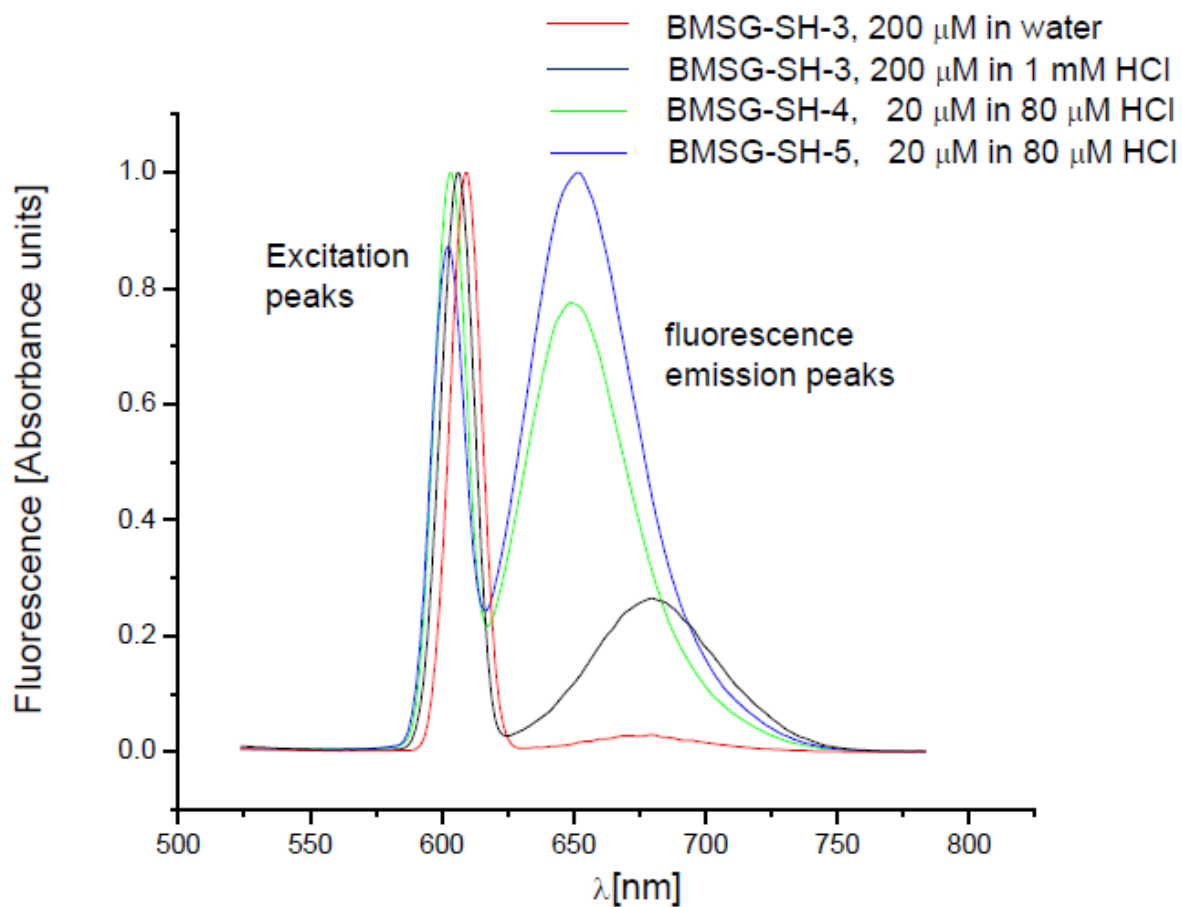

**Figure S1:** Fluorescence properties of compounds BMSG-SH-3 – 5 at 600 nm excitation. BMSG-SH-3 displays significantly lower fluorescence than the other derivatives, and it increases upon protonation. 4 equivalents of HCl were added to BMSG-SH-4 – 5 to form the soluble chloride salt.

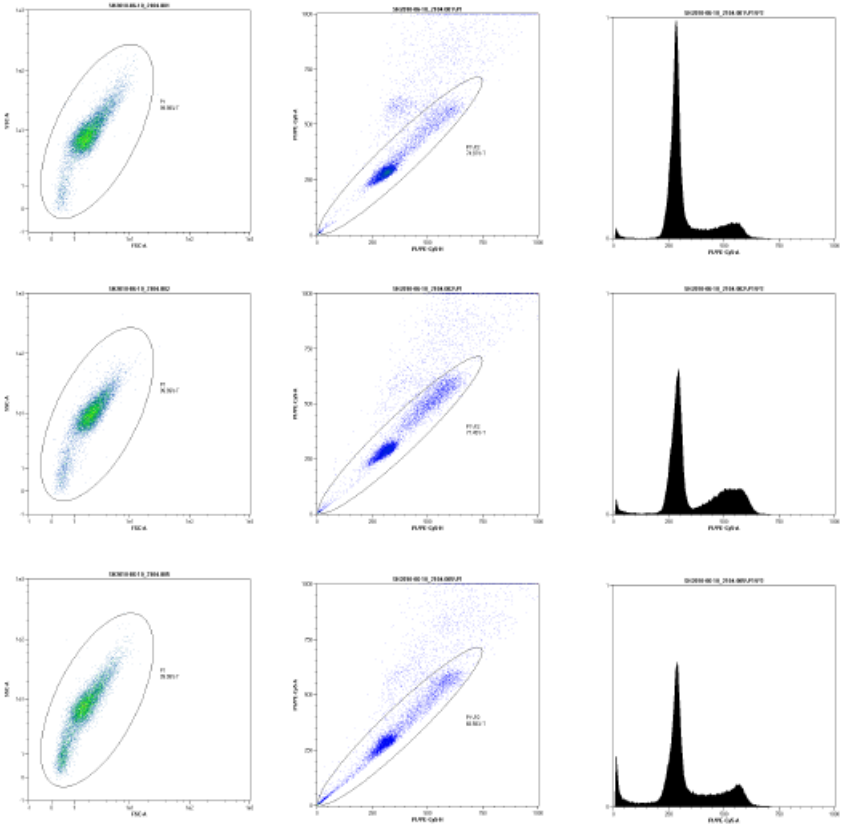

**A549 cells**

untreated

Etoposide, 14 h, 30  $\mu$ M

BMSG-SH-3, 14 h, 1  $\mu$ M

FigureS2: Evaluation of cell cycle analysis of A549 cells. 10000 events each.

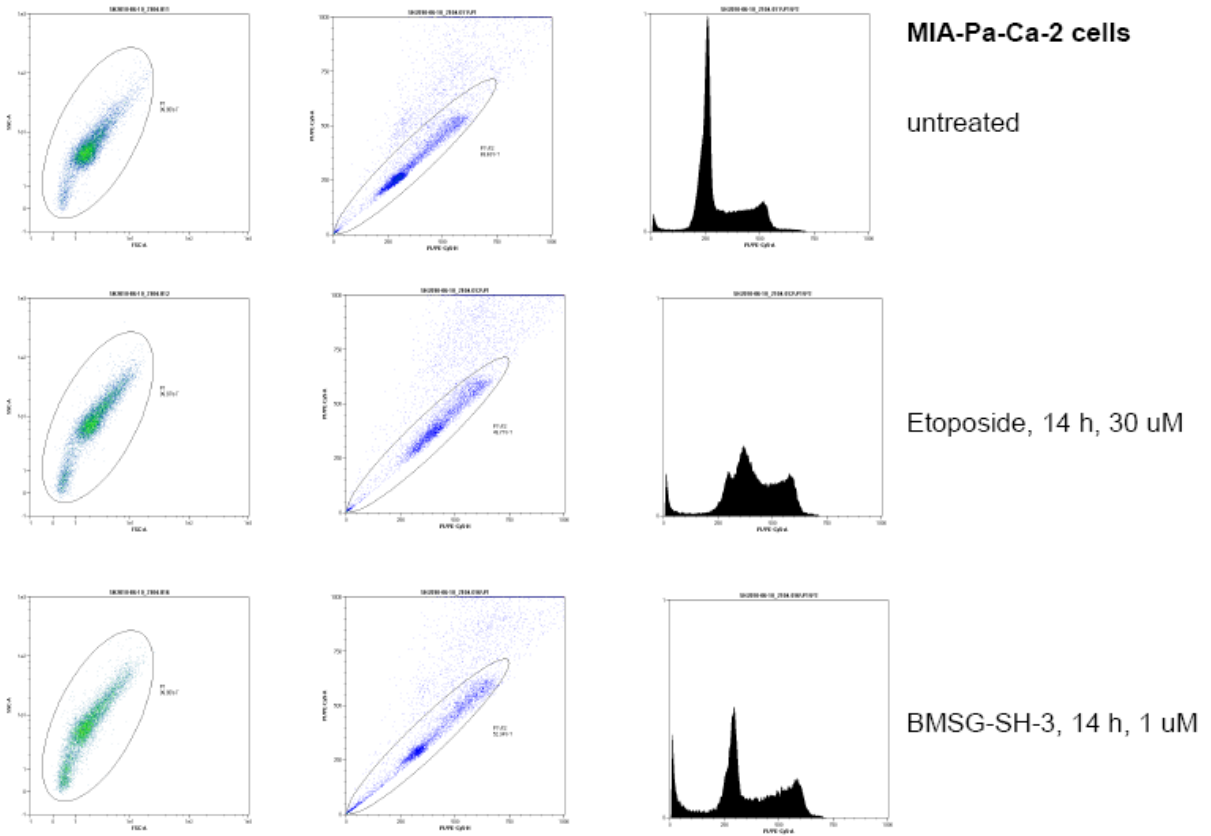

Figure S3: Evaluation of cell cycle analysis of MIA-Pa-Ca-2 cells. 10000 events each.



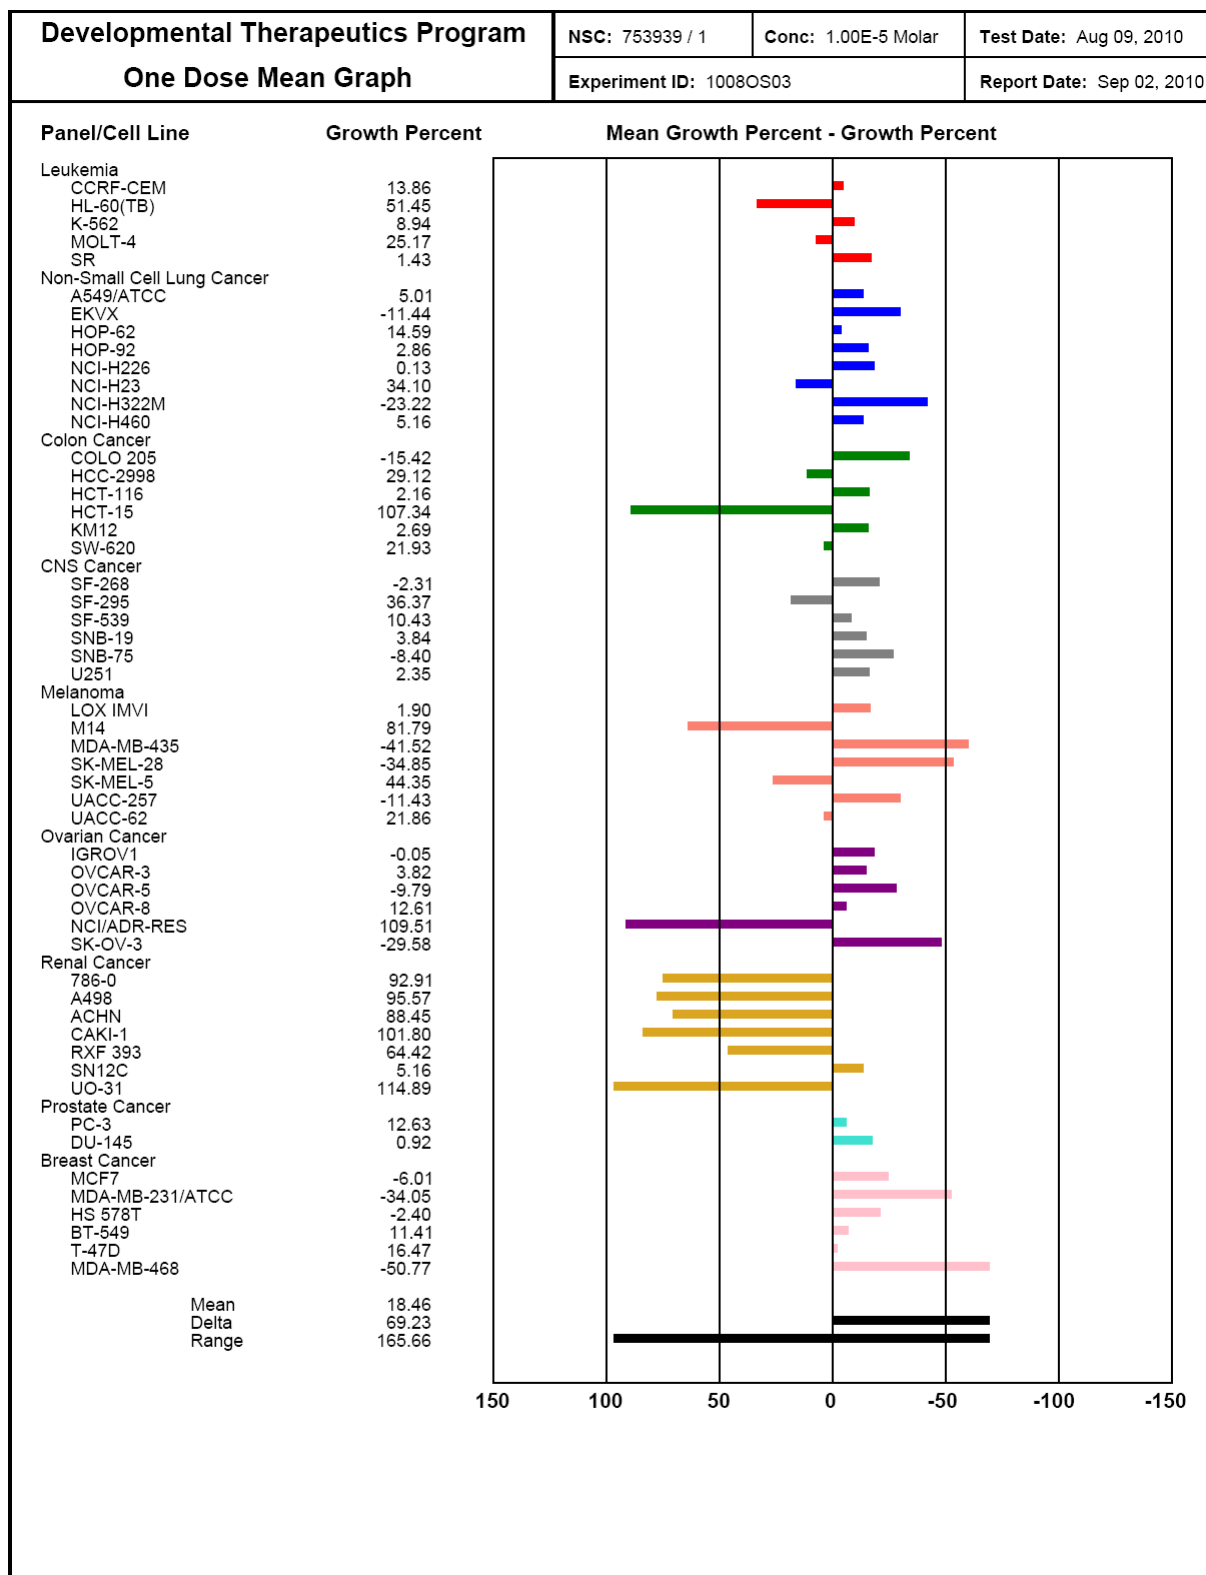

MOL #81075

Figure S4: NCI 60 cell line panel screen of BMSG-SH-3

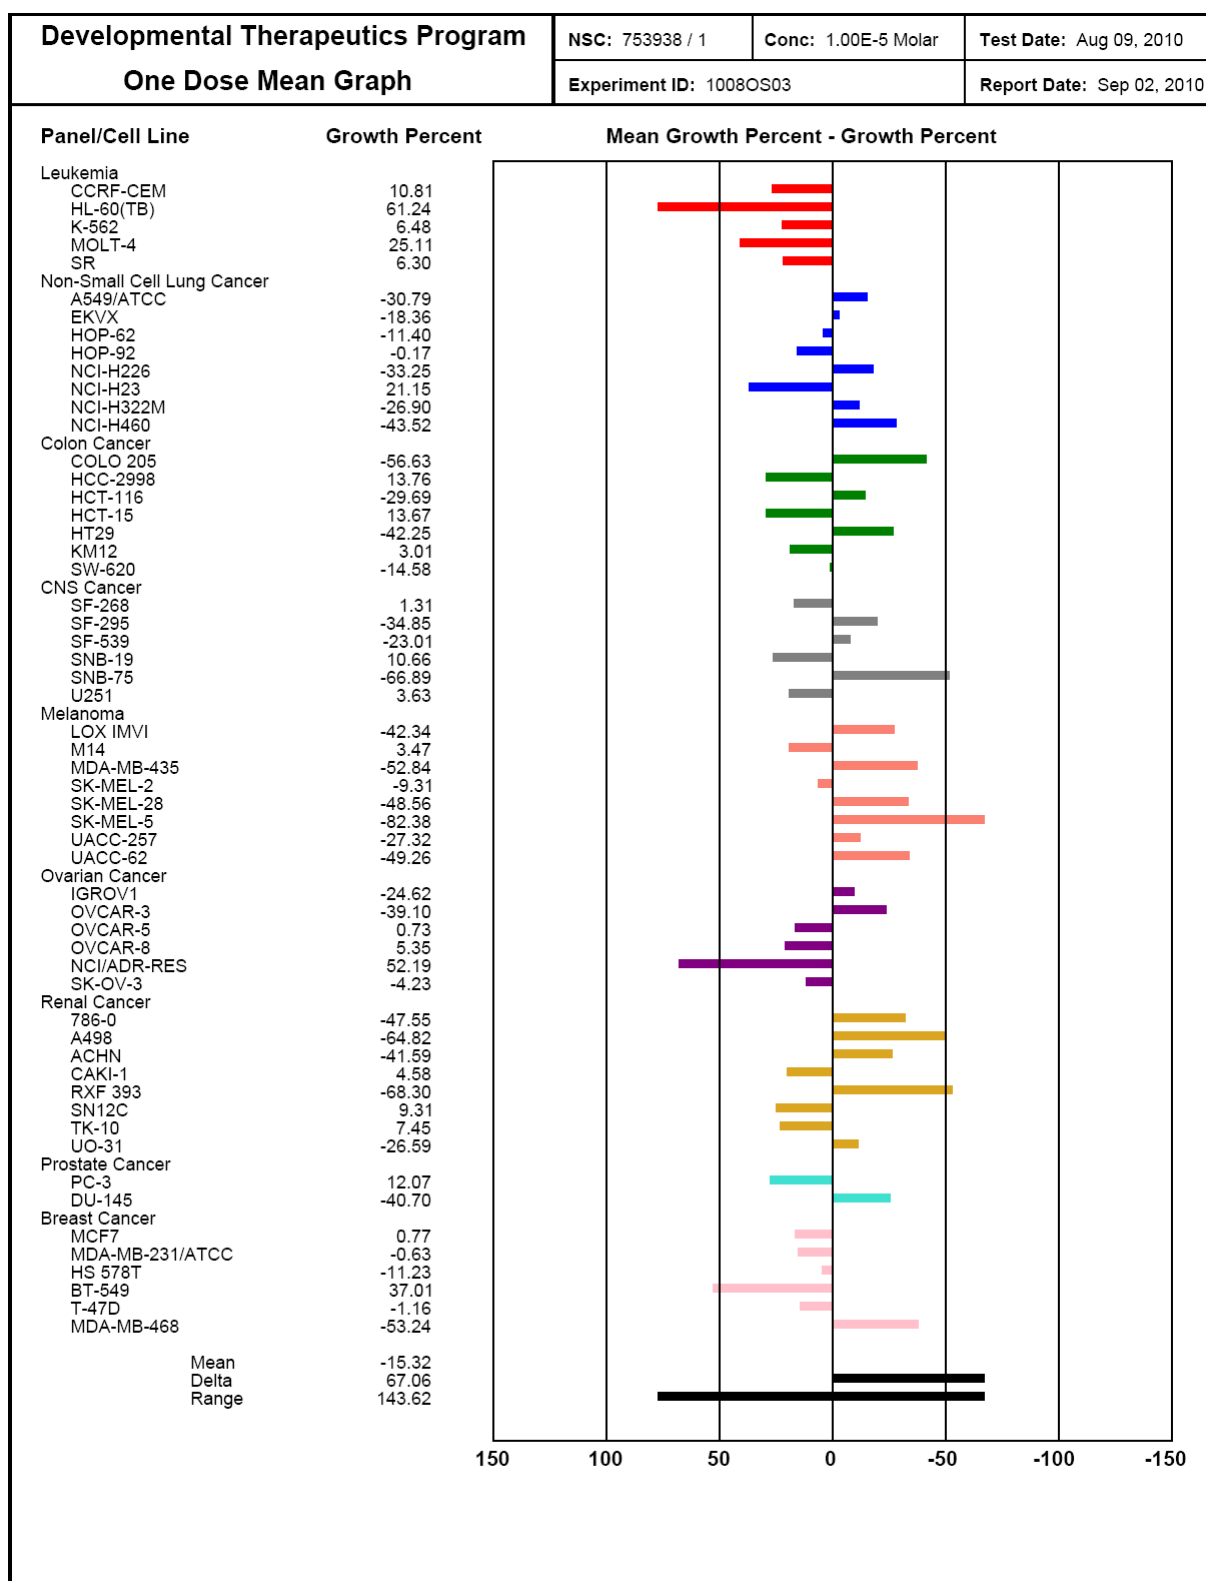

Figure S5: NCI 60 cell line panel screen of BMSG-SH-4

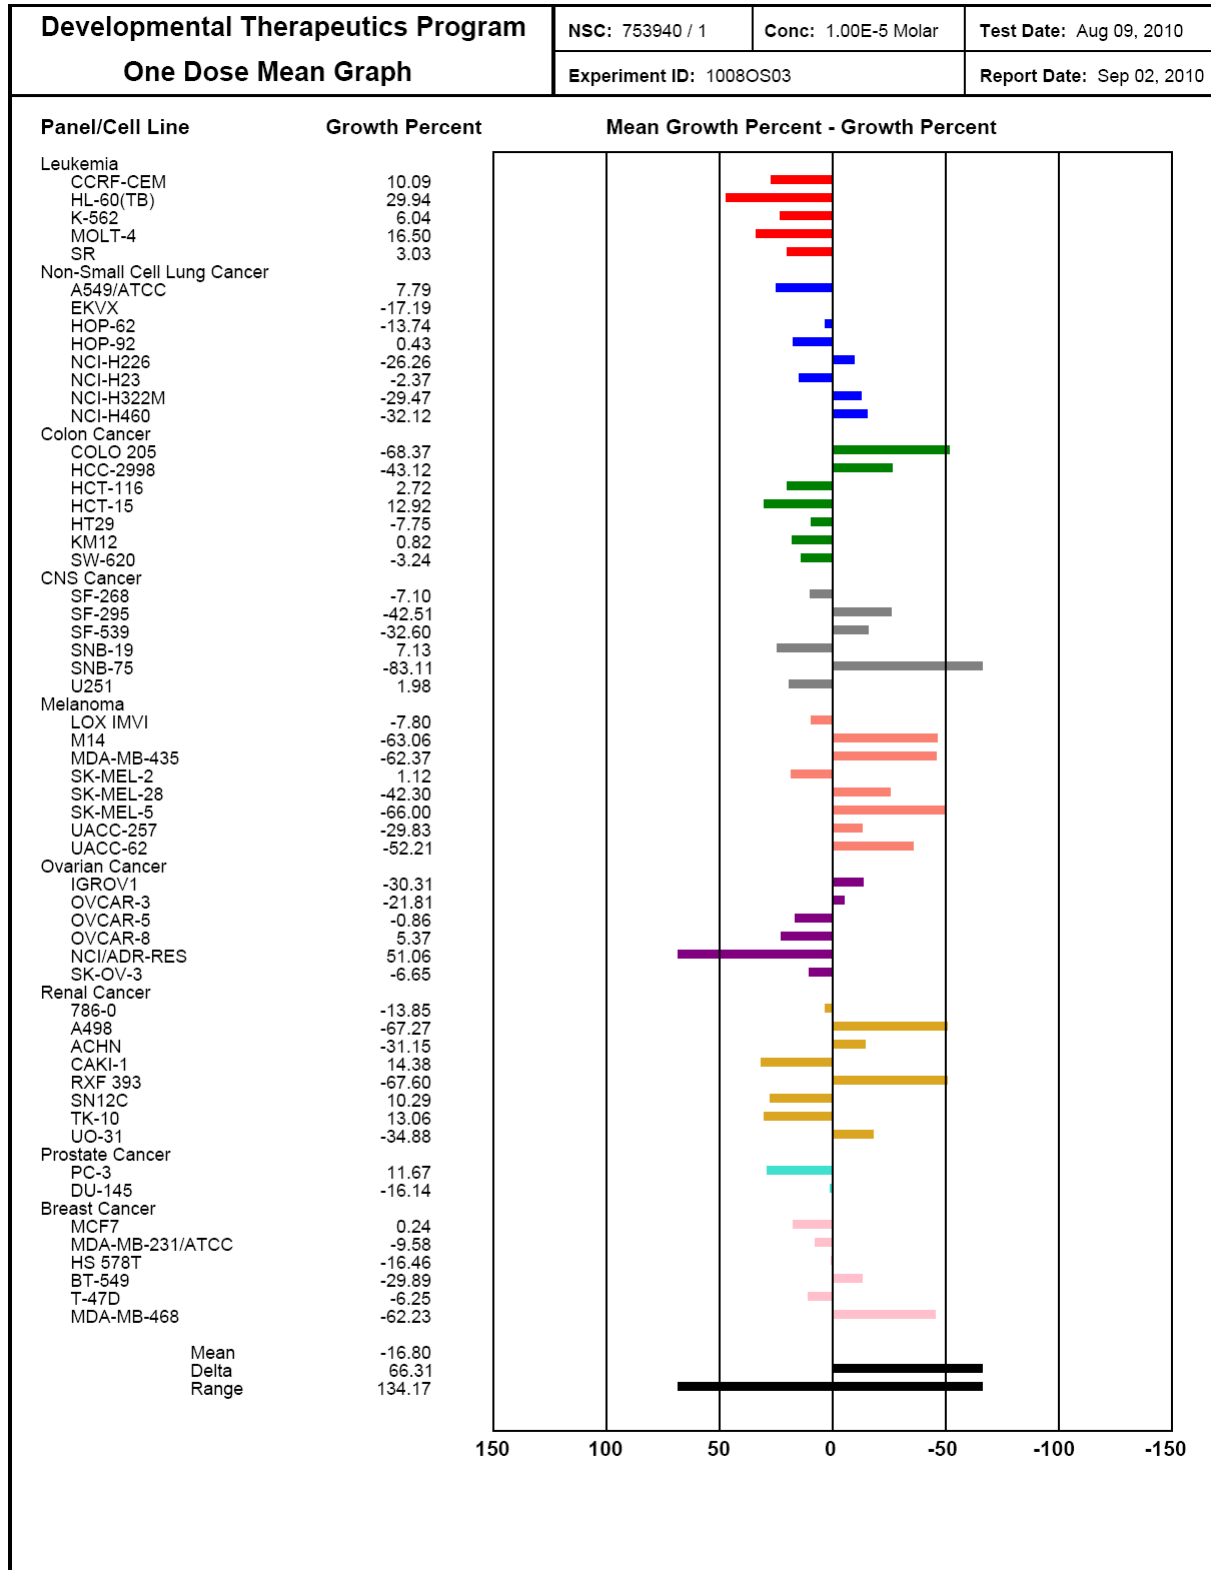

Figure S6: NCI 60 cell line panel screen of BMSG-SH-5

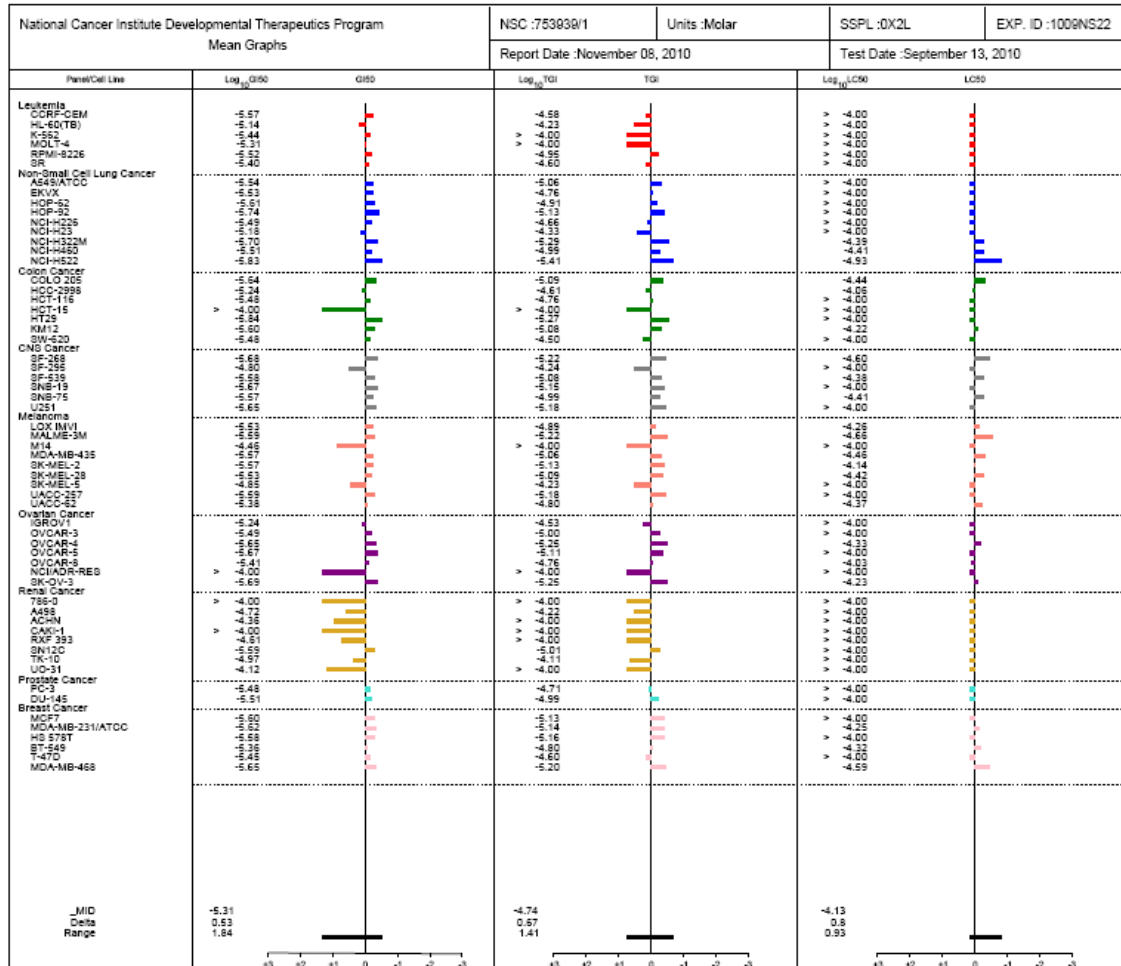

Figure S7: NCI 60 cell line panel screen of BMSG-SH-3, five dose range.

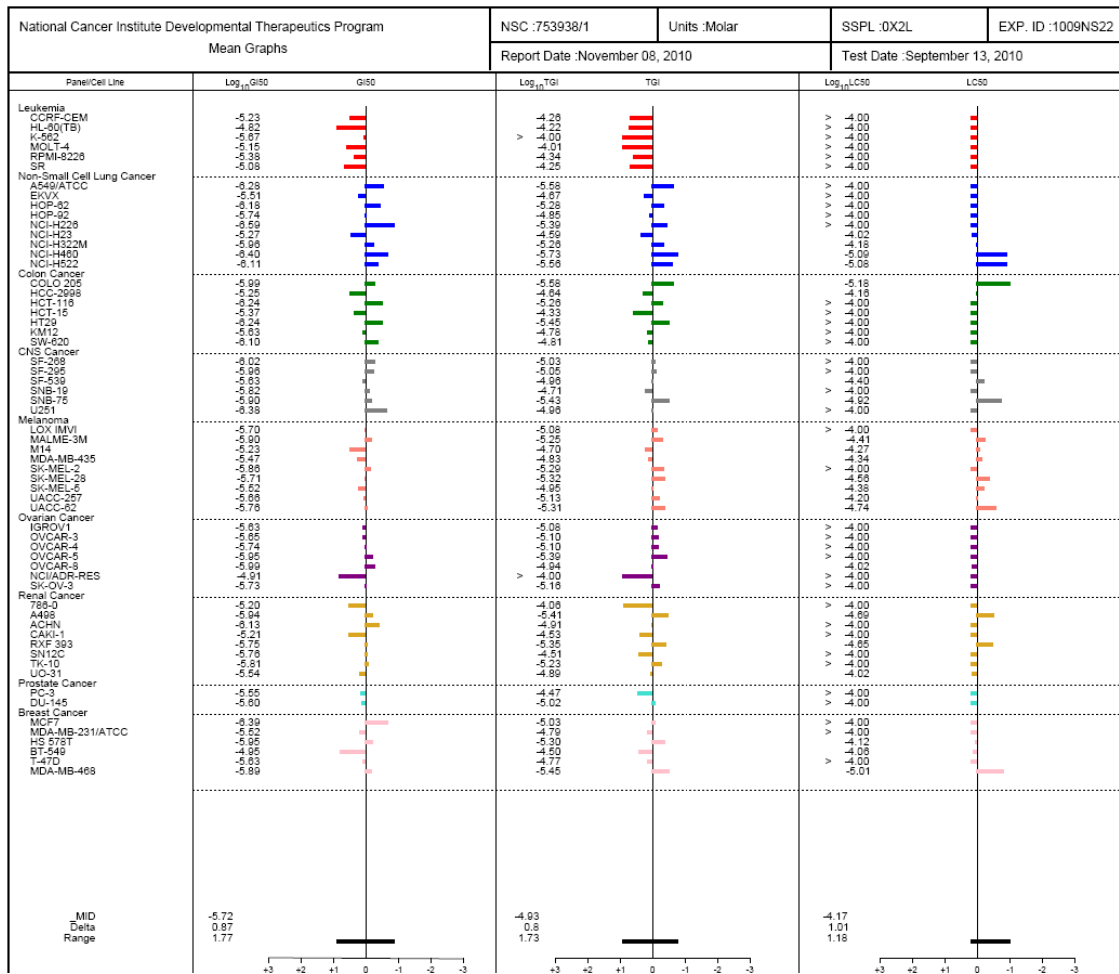

Figure S8: NCI 60 cell line panel screen of BMSG-SH-4, five dose range.

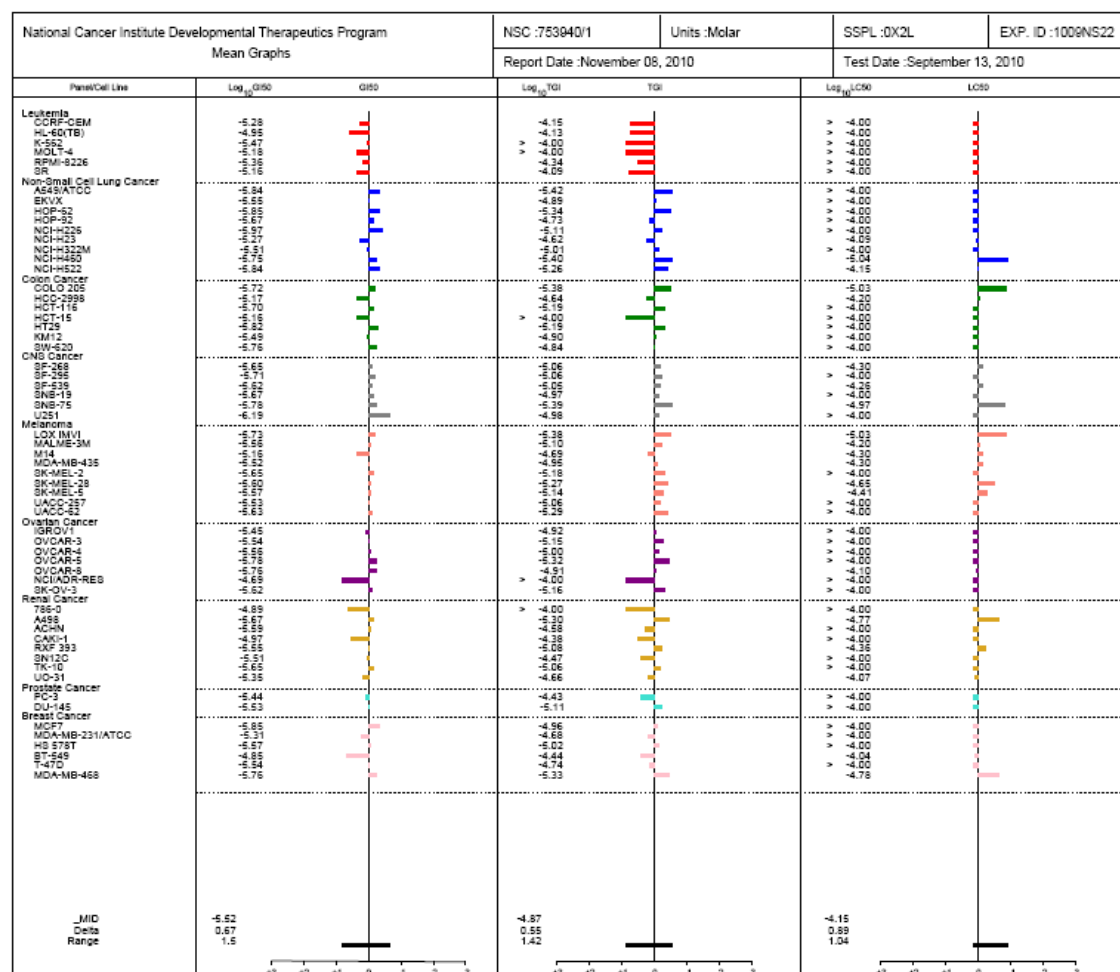

Figure S9: NCI 60 cell line panel screen of BMSG-SH-5, five dose range.

### References for Tables S2 and S3

Ahuja D, Geiger A, Ramanjulu JM, Vera MD, Sir Deshpande B, Pfizenmayer A, Abazeed M, Krosky DJ, Beidler D, Joullie MM, Toogood PL (2000) Inhibition of protein synthesis by didemnins: cell potency and SAR. *J Med Chem* **43**: 4212–4218.

Aron ZD, Pietraszkiwicz H, Overman LE, Valeriote F, Cuevas C (2004) Synthesis and anticancer activity of side chain analogs of the crambescidin alkaloids. *Bioorg Med Chem Lett* **14**: 3445-3449.

- Assem ESK, Peh KH, Wan BY, Manaviazar S, Walters MA, George JH, Hale KJ (2008) Pharmacological actions of a new synthetic cyclodepsipeptide, the A83586C-citropeptin hybrid, on complement C5a and G-proteins. *Inflamm Res***57**: S21-S22.
- Bai, L (2008) The noncovalent binding of benzophenanthridine alkaloids to double-stranded, bulged and G- quadruplex DNA. 248 pp.
- Banerjee T, Mukhopadhyay R (2008) Structural effects of nogalamycin, an antibiotic antitumour agent, on DNA. *Biochem Biophys Res Commun***374**: 264–268.
- Brooks TA, Brown RV, Gaerig VC, Danford FL, Hurley LH (2010) Transcriptional down regulation of c-Myc via G- quadruplex stabilization as novel therapy for non-Hodgkin lymphoma. Pacificchem International Chemical Congress of Pacific Basin Societies, Honolulu, HI, United States.
- Brooks TA, Gokhale V, Brown R, Hurley LH (2011) Specific targeting of the G- quadruplex in the c-Myc promoter with ellipticine. 241st ACS National Meeting & Exposition, Anaheim, CA, United States.
- Campagne S, Saurel O, Gervais V, Milon A (2010) Structural determinants of specific DNA-recognition by the THAP zinc finger. *Nucleic Acids Res***38**: 3466-3476.
- Cencic R, Carrier M, Galicia-Vazquez G, Bordeleau ME, Sukarieh R, Bourdeau A, Brem B, Teodoro JG, Greger H, Tremblay ML, Porco JA, Pelletier J (2009) Antitumor activity and mechanism of action of the cyclopenta[b]benzofuran, silvestrol. *PLoS One***4**: e5223.
- Chan J, Khan SN, Harvey I, Merrick W, Pelletier J (2004) Eukaryotic protein synthesis inhibitors identified by comparison of cytotoxicity profiles. *RNA***10**: 528–543.
- Cheglakov IB, Tevyashova AN, Kurbatov LK, Tatarsky VV, Samusenko AV, Preobrazhenskaya MN, Shtil AA (2010) Altered transcription and replication are the mechanisms of cytotoxicity of antitumor antibiotic olivomycin A. *Doklady Biochem Biophys***435**: 320-322.
- Clark GR, Pytel PD, Squire CJ, Neidle S (2003). Structure of the first parallel DNA quadruplex-drug



complex. *J Am Chem Soc***125**: 4066–4067.

Clouaire T, Roussigne M, Ecochard V, Mathe C, Amalric F, Girard JP (2005) The THAP domain of THAP1 is a large C2CH module with zinc-dependent sequence-specific DNA-binding activity. *Proc Nat Acad Sci U S A***102**: 6907-6912.

Dawes J (1994) Malformin A prevents IL-1 induced endothelial changes by inhibition of protein synthesis. *Thrombosis Haemostasis***72**: 482-3.

De Stefano I, Raspaglio G, Zannoni GF, Travaglia D, Prisco MG, Mosca M, Ferlini C, Scambia G, Gallo D (2009) Antiproliferative and antiangiogenic effects of the benzophenanthridine alkaloid sanguinarine in melanoma. *Biochem Pharmacol***78**: 1374-81.

Degl'innocenti D, Marzocchini R, Malentacchi F, Ramazzotti M, Raugei G, Ramponi G (2004) ACYP1 gene possesses two alternative splicing forms that induce apoptosis. *IUBMB Life***56**: 29-33.

Dezhenkova LG, Susova OY, Shchekotikhin AE, Preobrazhenskaya MN, Shtil AA (2008) Naphtho[2,3-f]indole-5,10-dione aminoalkyl derivatives: A new class of topoisomerase I inhibitors. *Bull Ex Biol Med***145**: 334-337.

Dimmock JR, Arora VK, Semple HA, Lee JS, Allen TM, Kao GY (1992) 3,5-Bis-arylidene-1-methyl-4-piperidone methohalides and related compounds with activity against L 1210 cells and DNA binding properties. *Pharmazie***47**: 246-8.

Elliott JA, Wilson WD, Shea RG, Hartley JA, Reszka K, Lown JW (1989) Interaction of bisantrene anticancer agents with DNA: Footprinting, structural requirements for DNA unwinding, kinetics and mechanism of binding and correlation of structural and kinetic parameters with anticancer activity. *Anti-Cancer Drug Des***3**: 271–82.

Farjaudon N, Guilloteau P, Lasselain MJ, Pareyre C (1988) Morphometric study of 'floating pole' anaphase cells induced by tubulosine in a meristematic root cell population (*Allium sativum* L.). *Cytobios***53**: 17-23.

Froissart, R, Millat G, Mathieu M, Rozon D, Maire I (1995) Processing of iduronate 2-sulfatase in human fibroblasts. *Biochem J***309**: 425-30.

Ghai R, Mobli M, Norwood SJ, Bugarcic A, Teasdale RD, King GF, Collins BM (2011) Phox homology band 4.1/ezrin/radixin/moesin-like proteins function as molecular scaffolds that interact with cargo receptors and Ras GTPases. *Proc Nat Acad Sci U S A***108**: 7763-8.

Gunz D, Naegeli H (1996) A noncovalent binding-translocation mechanism for site-specific CC - 1065 - DNA recognition. *Biochem Pharmacol***52**: 447-453.

Jin X, Jin HR, Lee D, Lee JH, Kim SK, Lee JJ (2008) A quassinoid 6 $\beta$ -tigloyloxychaparrinone inhibits hypoxia-inducible factor-1 pathway by inhibition of eukaryotic translation initiation factor 4E phosphorylation. *Eur J Pharmacol***592**: 41-47.

Jordan MA, Thrower D, Wilson L (1992) Effects of vinblastine, podophyllotoxin and nocodazole on mitotic spindles: Implications for the role of microtubule dynamics in mitosis. *J Cell Sci***102**: 401-16.

Kang X, Shafer RH, Kuntz ID (2004) Calculation of ligand-nucleic acid binding free energies with the generalized-born model in DOCK. *Biopolymers***73**: 192-204.

Kim JY, Ozato K (2009) The sequestosome 1/p62 attenuates cytokine gene expression in activated macrophages by inhibiting IFN regulatory factor 8 and TNF receptor-associated factor 6/NF-kappaB activity. *J Immunol***182**: 2131-40.

Kobayashi Y, Shibusawa A, Saito H, Ohshiro N, Ohbayashi M, Kohyama N, Yamamoto T (2005) Isolation and Functional Characterization of a Novel Organic Solute Carrier Protein, hOSCP1. *J Biol Chem***280**: 32332-32339.

Kodama T, Tanaka T, Kawamura T, Wada Y, Sugiyama A, Fukunishi Y (2011) Pr-set7 inhibitor and therapeutic and/or preventive agent for cancer or life style-related disease. PCT Int. Appl. WO/2011/010715.

Kohroki J, Nishiyama T, Nakamura T, Masuho Y (2005) ASB proteins interact with Cullin5 and Rbx2 to form E3 ubiquitin ligase complexes. *FEBS Lett***579**: 6796-6802.

Kuksa VA, Pavlov VA, Lin PKT (2002) Novel oxa - spermine homologues: synthesis and cytotoxic properties. *Bioorg Med Chem***10**: 691-697.

Kumar V, Malhotra SV (2009) Study on the potential anti- cancer activity of phosphonium and ammonium-based ionic liquids. *Bioorg Med Chem Lett***19**: 4643-4646.

Larue L, Quesne M, Paoletti J (1987) Interaction of an intercalating antitumoral agent: 9-hydroxy-2-methyl ellipticinium (NMHE) with chromatin. *Biochem Pharmacol***36**: 3563-9.

Lee S, Tak E, Lee J, Rashid M, Murphy MP, Ha J, Kim S (2011) Mitochondrial H<sub>2</sub>O<sub>2</sub> generated from electron transport chain complex I stimulates muscle differentiation. *Cell Res***21**: 817-834.

Maiti M, Suresh KG (2010) Polymorphic nucleic Acid binding of bioactive isoquinoline alkaloids and their role in cancer. *J Nucleic Acids* 101533042.

Manet I, Manoli F, Zambelli B, Andreano G, Masi A, Cellai L, Monti S (2010) Affinity of the anthracycline antitumor drugs Doxorubicin and Sabarubicin for human telomeric G- quadruplex structures. *Phys Chem Chem Phys***13**: 540–551.

Mansilla S, Portugal J (2008) Sp1 transcription factor as a target for anthracyclines: Effects on gene transcription. *Biochim***90**: 973–1108.

Mata-Greenwood E, Cuendet M, Sher D, Gustin D, Stock W, Pezzuto JM (2002) Brusatol-mediated induction of leukemic cell differentiation and G1 arrest is associated with down-regulation of c-myc. *Leukemia***16**: 2275-2284.

Millard M, Pathania D, Shabaik Y, Taheri L, Deng, J, Neamati Nouri (2010) Preclinical evaluation of novel triphenylphosphonium salts with broad-spectrum activity. *PLoS One***5**: e13131.

Nguyen CH, Bisagni E, Pepin O, Pierre A, De Cointet P (1987) 1-Amino-substituted 4-methyl-5H-pyrido[3',4':4,5]pyrrolo[3,2-c]pyridines: a new class of antineoplastic agents. *J Med Chem***30**: 1642-7.

Olugbade TA, Waigh RD (1996) Synthetic benzo[c]phenanthridines with antileukemic activity in mice. *Pharmaceut Sci***2**: 259-264.

Ota T, Suzuki Y, Nishikawa T, Otsuki T, Sugiyama T, Irie R, Wakamatsu A et al. (2004) Complete sequencing and characterization of 21,243 full-length human cDNAs. *Nature Genetics***36**: 40-45.

Pares Y, Bricage P (1978) Study of the antibiotic power of phosphonium bromides on new regularly isolated mycobacteria species from leprosy organisms and some other mycobacteria. Comparison with classic antileprosy agents. *Actes Congr. Int. Composés Phosphores*, 1st, 485-94.

Paunescu TG, Russo LM, Da Silva N, Kovacicova J, Mohebbi N, Van Hoek AN, McKee M, Wagner CA; Breton S, Brown D (2007) Compensatory membrane expression of the V-ATPase B2 subunit isoform in renal medullary intercalated cells of B1-deficient mice. *Am J Physiol Renal Physiol***293**: F1915-26.

Saito T, Kitamura M, Tanaka M, Morimoto M, Segawa H, Shimidzu T (1994) Photochemical cleavage of DNA with phosphorus(V)porphyrin derivatives. *Nucleosides & Nucleotides***13**: 1607-15.

Santoro C, Mermod N, Andrews PC, Tjian R (1988) A family of human CCAAT-box-binding proteins active in transcription and DNA replication: cloning and expression of multiple cDNAs. *Nature***334**: 218-24.

- Spicer JA, Gamage SA, Finlay GJ, Denny WA (2002) Synthesis and evaluation of unsymmetrical bis(arylcarboxamides) designed as topoisomerase-targeted anticancer drugs. *Bioorg Med Chem***10**: 19-29.
- Spychala, J (2008) The usefulness of cyclic diamidines with different core-substituents as antitumor agents. *Bioorg Chem***36**: 183-189.
- Spychala, J (2009) Selective cytostatic and cytotoxic anticancer effects of bisfunctional agents: A strategy for the design of DNA binding agents. *Cancer Lett***281**: 203-212.
- Sriram M, Liaw YC, Gao, YG, Wang, AHJ (1991) Molecular structure of antitumor drug steffimycin and modeling of its binding to DNA. *J Biomol Struct Dynam***9**: 251–269.
- Stermitz FR, Gillespie JP, Amoros LG, Romero R, Stermitz TA, Larson KA, Earl S, Ogg JE (1975) Synthesis and biological activity of some antitumor benzophenanthridinium salts. *J Med Chem***18**: 708-13.
- Stone S, Gutin A, Wagner S, Reid J (2010) Cell cycle-regulated gene expression markers for use in the prognosis of cancer. PCT Int. Appl. 20120041274.
- Tong GL, Wu HY, Smith TH, Henry DW (1979) Adriamycin analogs. 3. Synthesis of N-alkylated anthracyclines with enhanced efficacy and reduced cardiotoxicity. *J Med Chem***22**: 912-18.
- Wakelin LPG, Waring MJ (1974) Unwinding of circular deoxyribonucleic acid by phenanthridinium drugs. Structure-activity relations for the intercalation reaction. *Mol Pharmacol***10**: 544-61.
- Wakita KI, Minami M, Venkateswarlu A, Sharma VM, Ramesh M, Akahane K (2001) Antitumor bicyclic hexapeptide RA-VII modulates cyclin D1 protein level. *Anti-Cancer Drugs***12**: 433-439.
- Yamamoto ML, Clark TA, Gee SL, Kang JA, Schweitzer AC, Wickrema A, Conboy JG (2009) Alternative pre-mRNA splicing switches modulate gene expression in late erythropoiesis *Blood***113**: 3363-3370.

Yang S, Xiang J, Yang Q, Li, Q, Zhou Q, Zhang X, Tan Y, Xu G (2010) Formation of human telomeric G-quadruplex structures induced by the quaternary benzophenanthridine alkaloids: sanguinarine, nitidine, and chelerythrine. *Chin J Chem***28**: 771-780.

Zalacain M, Zaera E, Vazquez D, Jimenez A (1982) The mode of action of the antitumor drug bouvardin , an inhibitor of protein synthesis in eukaryotic cells. *FEBS Lett***148**: 95-7.
